# Supplementary material for: Synthesis and Crystal Structure of Adamantylated 4,5,6,7-Tetrahalogeno-1H-benzimidazoles Novel Multi-Target Ligands (Potential CK2, M2 and SARS-CoV-2 Inhibitors); X-ray/DFT/QTAIM/Hirshfeld Surfaces/Molecular Docking Study
Source: MDPI journal article supplement (doi:10.3390/molecules28010147), 2022-12-24
Supplement: s1 [file s1]

**Synthesis and Crystal Structure of Adamantylated 4,5,6,7-tetrahalogeno-1*H*-  
benzimidazoles Novel Multi-Target Ligands (Potential CK2, M2 and SARS-CoV-2  
inhibitors). X-ray/DFT/QTAIM/Hirshfeld Surfaces/Molecular Docking Study**

Jolanta Natalia Latosińska, Magdalena Latosińska, Andrzej Orzeszko, Jan Krzysztof Maurin

Supplementary

Table S1. Atomic coordinates ( $\times 10^4$ ) and equivalent isotropic displacement parameters ( $\text{\AA}^2 \times 10^3$ ) for AB.  
U(eq) is defined as one third of the trace of the orthogonalized  $U^{ij}$  tensor.

|       | x        | y       | z        | U(eq) |
|-------|----------|---------|----------|-------|
| N(1)  | 3967(2)  | 8424(1) | 224(1)   | 42(1) |
| C(2)  | 2053(2)  | 8781(2) | 221(1)   | 49(1) |
| N(3)  | 1227(2)  | 8644(1) | 1259(1)  | 52(1) |
| C(4)  | 2710(2)  | 8156(1) | 2020(1)  | 46(1) |
| C(5)  | 2702(3)  | 7860(2) | 3233(1)  | 63(1) |
| C(6)  | 4409(3)  | 7446(2) | 3765(2)  | 81(1) |
| C(7)  | 6126(3)  | 7349(2) | 3117(2)  | 79(1) |
| C(8)  | 6183(2)  | 7631(2) | 1918(1)  | 57(1) |
| C(9)  | 4439(2)  | 8023(1) | 1387(1)  | 42(1) |
| C(10) | 5272(2)  | 8464(1) | -790(1)  | 47(1) |
| C(11) | 5834(2)  | 6979(1) | -854(1)  | 43(1) |
| C(12) | 7413(2)  | 6947(1) | -1803(1) | 38(1) |
| C(13) | 9273(2)  | 7541(1) | -1597(1) | 45(1) |
| C(14) | 10863(2) | 7450(2) | -2515(1) | 53(1) |
| C(15) | 10220(2) | 8331(2) | -3740(1) | 59(1) |
| C(16) | 8409(2)  | 7735(2) | -3978(1) | 55(1) |
| C(17) | 6810(2)  | 7825(2) | -3056(1) | 47(1) |
| C(18) | 7865(2)  | 5387(1) | -1746(1) | 48(1) |
| C(19) | 9465(2)  | 5292(2) | -2663(1) | 54(1) |
| C(20) | 11284(2) | 5887(2) | -2430(2) | 59(1) |
| C(21) | 8824(2)  | 6169(2) | -3894(1) | 61(1) |

Table S2. Bond lengths [ $\text{\AA}$ ] and angles [ $^\circ$ ] for AB.

|              |            |
|--------------|------------|
| N(1)-C(2)    | 1.3575(17) |
| N(1)-C(9)    | 1.3819(16) |
| N(1)-C(10)   | 1.4583(16) |
| C(2)-N(3)    | 1.3049(19) |
| C(2)-H(2)    | 0.951(16)  |
| N(3)-C(4)    | 1.3871(18) |
| C(4)-C(5)    | 1.391(2)   |
| C(4)-C(9)    | 1.4006(18) |
| C(5)-C(6)    | 1.368(3)   |
| C(5)-H(5)    | 0.9300     |
| C(6)-C(7)    | 1.396(3)   |
| C(6)-H(6)    | 0.9300     |
| C(7)-C(8)    | 1.375(2)   |
| C(7)-H(7)    | 0.9300     |
| C(8)-C(9)    | 1.3895(19) |
| C(8)-H(8)    | 0.9300     |
| C(10)-C(11)  | 1.5243(17) |
| C(10)-H(10A) | 0.9700     |
| C(10)-H(10B) | 0.9700     |
| C(11)-C(12)  | 1.5331(17) |
| C(11)-H(11A) | 0.9700     |
| C(11)-H(11B) | 0.9700     |
| C(12)-C(18)  | 1.5374(16) |
| C(12)-C(17)  | 1.5388(17) |
| C(12)-C(13)  | 1.5404(16) |
| C(13)-C(14)  | 1.5264(19) |
| C(13)-H(13A) | 0.9700     |
| C(13)-H(13B) | 0.9700     |
| C(14)-C(15)  | 1.521(2)   |
| C(14)-C(20)  | 1.528(2)   |
| C(14)-H(14)  | 0.9800     |
| C(15)-C(16)  | 1.526(2)   |
| C(15)-H(15A) | 0.9700     |
| C(15)-H(15B) | 0.9700     |

|                 |            |
|-----------------|------------|
| C(16)-C(21)     | 1.531(2)   |
| C(16)-C(17)     | 1.5342(19) |
| C(16)-H(16)     | 0.9800     |
| C(17)-H(17A)    | 0.9700     |
| C(17)-H(17B)    | 0.9700     |
| C(18)-C(19)     | 1.5311(19) |
| C(18)-H(18A)    | 0.9700     |
| C(18)-H(18B)    | 0.9700     |
| C(19)-C(21)     | 1.527(2)   |
| C(19)-C(20)     | 1.527(2)   |
| C(19)-H(19)     | 0.9800     |
| C(20)-H(20A)    | 0.9700     |
| C(20)-H(20B)    | 0.9700     |
| C(21)-H(21A)    | 0.9700     |
| C(21)-H(21B)    | 0.9700     |
| C(2)-N(1)-C(9)  | 105.96(11) |
| C(2)-N(1)-C(10) | 127.35(12) |
| C(9)-N(1)-C(10) | 126.68(11) |
| N(3)-C(2)-N(1)  | 114.65(13) |
| N(3)-C(2)-H(2)  | 125.6(10)  |
| N(1)-C(2)-H(2)  | 119.7(10)  |
| C(2)-N(3)-C(4)  | 104.02(11) |
| N(3)-C(4)-C(5)  | 130.14(13) |
| N(3)-C(4)-C(9)  | 110.20(11) |
| C(5)-C(4)-C(9)  | 119.62(13) |
| C(6)-C(5)-C(4)  | 118.10(15) |
| C(6)-C(5)-H(5)  | 121.0      |
| C(4)-C(5)-H(5)  | 121.0      |
| C(5)-C(6)-C(7)  | 121.56(15) |
| C(5)-C(6)-H(6)  | 119.2      |
| C(7)-C(6)-H(6)  | 119.2      |
| C(8)-C(7)-C(6)  | 121.80(16) |
| C(8)-C(7)-H(7)  | 119.1      |
| C(6)-C(7)-H(7)  | 119.1      |
| C(7)-C(8)-C(9)  | 116.33(15) |
| C(7)-C(8)-H(8)  | 121.8      |

|                     |            |
|---------------------|------------|
| C(9)-C(8)-H(8)      | 121.8      |
| N(1)-C(9)-C(8)      | 132.19(13) |
| N(1)-C(9)-C(4)      | 105.16(11) |
| C(8)-C(9)-C(4)      | 122.56(13) |
| N(1)-C(10)-C(11)    | 112.91(10) |
| N(1)-C(10)-H(10A)   | 109.0      |
| C(11)-C(10)-H(10A)  | 109.0      |
| N(1)-C(10)-H(10B)   | 109.0      |
| C(11)-C(10)-H(10B)  | 109.0      |
| H(10A)-C(10)-H(10B) | 107.8      |
| C(10)-C(11)-C(12)   | 114.77(10) |
| C(10)-C(11)-H(11A)  | 108.6      |
| C(12)-C(11)-H(11A)  | 108.6      |
| C(10)-C(11)-H(11B)  | 108.6      |
| C(12)-C(11)-H(11B)  | 108.6      |
| H(11A)-C(11)-H(11B) | 107.6      |
| C(11)-C(12)-C(18)   | 109.05(9)  |
| C(11)-C(12)-C(17)   | 112.30(10) |
| C(18)-C(12)-C(17)   | 108.08(10) |
| C(11)-C(12)-C(13)   | 111.11(9)  |
| C(18)-C(12)-C(13)   | 108.04(10) |
| C(17)-C(12)-C(13)   | 108.12(10) |
| C(14)-C(13)-C(12)   | 110.80(10) |
| C(14)-C(13)-H(13A)  | 109.5      |
| C(12)-C(13)-H(13A)  | 109.5      |
| C(14)-C(13)-H(13B)  | 109.5      |
| C(12)-C(13)-H(13B)  | 109.5      |
| H(13A)-C(13)-H(13B) | 108.1      |
| C(15)-C(14)-C(13)   | 109.13(11) |
| C(15)-C(14)-C(20)   | 109.92(12) |
| C(13)-C(14)-C(20)   | 109.73(12) |
| C(15)-C(14)-H(14)   | 109.3      |
| C(13)-C(14)-H(14)   | 109.3      |
| C(20)-C(14)-H(14)   | 109.3      |
| C(14)-C(15)-C(16)   | 109.73(11) |
| C(14)-C(15)-H(15A)  | 109.7      |

|                     |            |
|---------------------|------------|
| C(16)-C(15)-H(15A)  | 109.7      |
| C(14)-C(15)-H(15B)  | 109.7      |
| C(16)-C(15)-H(15B)  | 109.7      |
| H(15A)-C(15)-H(15B) | 108.2      |
| C(15)-C(16)-C(21)   | 109.52(13) |
| C(15)-C(16)-C(17)   | 109.04(11) |
| C(21)-C(16)-C(17)   | 109.58(12) |
| C(15)-C(16)-H(16)   | 109.6      |
| C(21)-C(16)-H(16)   | 109.6      |
| C(17)-C(16)-H(16)   | 109.6      |
| C(16)-C(17)-C(12)   | 110.61(11) |
| C(16)-C(17)-H(17A)  | 109.5      |
| C(12)-C(17)-H(17A)  | 109.5      |
| C(16)-C(17)-H(17B)  | 109.5      |
| C(12)-C(17)-H(17B)  | 109.5      |
| H(17A)-C(17)-H(17B) | 108.1      |
| C(19)-C(18)-C(12)   | 111.17(10) |
| C(19)-C(18)-H(18A)  | 109.4      |
| C(12)-C(18)-H(18A)  | 109.4      |
| C(19)-C(18)-H(18B)  | 109.4      |
| C(12)-C(18)-H(18B)  | 109.4      |
| H(18A)-C(18)-H(18B) | 108.0      |
| C(21)-C(19)-C(20)   | 109.69(12) |
| C(21)-C(19)-C(18)   | 109.12(12) |
| C(20)-C(19)-C(18)   | 109.46(11) |
| C(21)-C(19)-H(19)   | 109.5      |
| C(20)-C(19)-H(19)   | 109.5      |
| C(18)-C(19)-H(19)   | 109.5      |
| C(19)-C(20)-C(14)   | 109.16(11) |
| C(19)-C(20)-H(20A)  | 109.8      |
| C(14)-C(20)-H(20A)  | 109.8      |
| C(19)-C(20)-H(20B)  | 109.8      |
| C(14)-C(20)-H(20B)  | 109.8      |
| H(20A)-C(20)-H(20B) | 108.3      |
| C(19)-C(21)-C(16)   | 109.47(11) |
| C(19)-C(21)-H(21A)  | 109.8      |

|                     |       |
|---------------------|-------|
| C(16)-C(21)-H(21A)  | 109.8 |
| C(19)-C(21)-H(21B)  | 109.8 |
| C(16)-C(21)-H(21B)  | 109.8 |
| H(21A)-C(21)-H(21B) | 108.2 |

---

Symmetry transformations used to generate equivalent atoms:

Table S3. Anisotropic displacement parameters ( $\text{\AA}^2 \times 10^3$ ) for AB. The anisotropic displacement factor exponent takes the form:  $-2\pi^2 [h^2 a^{*2} U^{11} + \dots + 2 h k a^* b^* U^{12}]$

|       | $U^{11}$ | $U^{22}$ | $U^{33}$ | $U^{23}$ | $U^{13}$ | $U^{12}$ |
|-------|----------|----------|----------|----------|----------|----------|
| N(1)  | 42(1)    | 41(1)    | 47(1)    | -19(1)   | 1(1)     | -1(1)    |
| C(2)  | 43(1)    | 51(1)    | 58(1)    | -24(1)   | -7(1)    | -1(1)    |
| N(3)  | 40(1)    | 57(1)    | 64(1)    | -26(1)   | 2(1)     | -4(1)    |
| C(4)  | 47(1)    | 41(1)    | 52(1)    | -20(1)   | 5(1)     | -5(1)    |
| C(5)  | 71(1)    | 67(1)    | 53(1)    | -24(1)   | 12(1)    | -2(1)    |
| C(6)  | 100(1)   | 94(1)    | 50(1)    | -29(1)   | -11(1)   | 16(1)    |
| C(7)  | 76(1)    | 98(1)    | 69(1)    | -38(1)   | -26(1)   | 25(1)    |
| C(8)  | 49(1)    | 63(1)    | 64(1)    | -29(1)   | -8(1)    | 11(1)    |
| C(9)  | 44(1)    | 36(1)    | 48(1)    | -18(1)   | 0(1)     | -1(1)    |
| C(10) | 55(1)    | 40(1)    | 47(1)    | -17(1)   | 8(1)     | -4(1)    |
| C(11) | 48(1)    | 37(1)    | 44(1)    | -15(1)   | 3(1)     | -5(1)    |
| C(12) | 42(1)    | 34(1)    | 38(1)    | -13(1)   | -2(1)    | -2(1)    |
| C(13) | 45(1)    | 44(1)    | 49(1)    | -19(1)   | -7(1)    | -1(1)    |
| C(14) | 40(1)    | 54(1)    | 67(1)    | -25(1)   | 0(1)     | -6(1)    |
| C(15) | 64(1)    | 49(1)    | 58(1)    | -15(1)   | 17(1)    | -9(1)    |
| C(16) | 66(1)    | 59(1)    | 37(1)    | -13(1)   | -1(1)    | 0(1)     |
| C(17) | 48(1)    | 50(1)    | 43(1)    | -15(1)   | -8(1)    | 2(1)     |
| C(18) | 55(1)    | 35(1)    | 53(1)    | -16(1)   | 4(1)     | -4(1)    |
| C(19) | 59(1)    | 41(1)    | 65(1)    | -26(1)   | 7(1)     | 0(1)     |
| C(20) | 48(1)    | 57(1)    | 71(1)    | -24(1)   | 1(1)     | 8(1)     |
| C(21) | 67(1)    | 71(1)    | 56(1)    | -36(1)   | 9(1)     | -8(1)    |

Table S4. Hydrogen coordinates ( $\times 10^4$ ) and isotropic displacement parameters ( $\text{\AA}^2 \times 10^3$ ) for AB.

|        | x        | y        | z        | U(eq) |
|--------|----------|----------|----------|-------|
| H(2)   | 1440(20) | 9142(17) | -507(14) | 59    |
| H(5)   | 1569     | 7940     | 3669     | 76    |
| H(6)   | 4425     | 7225     | 4577     | 97    |
| H(7)   | 7262     | 7085     | 3507     | 94    |
| H(8)   | 7327     | 7563     | 1487     | 69    |
| H(10A) | 6424     | 8924     | -747     | 57    |
| H(10B) | 4663     | 9041     | -1507    | 57    |
| H(11A) | 4701     | 6577     | -1004    | 51    |
| H(11B) | 6264     | 6365     | -92      | 51    |
| H(13A) | 9027     | 8533     | -1643    | 54    |
| H(13B) | 9686     | 6996     | -813     | 54    |
| H(14)  | 12029    | 7835     | -2368    | 63    |
| H(15A) | 11233    | 8297     | -4328    | 70    |
| H(15B) | 9961     | 9324     | -3792    | 70    |
| H(16)  | 8003     | 8300     | -4770    | 67    |
| H(17A) | 5648     | 7460     | -3208    | 57    |
| H(17B) | 6538     | 8819     | -3116    | 57    |
| H(18A) | 8256     | 4815     | -963     | 57    |
| H(18B) | 6716     | 4997     | -1888    | 57    |
| H(19)  | 9726     | 4288     | -2607    | 64    |
| H(20A) | 12305    | 5825     | -3006    | 71    |
| H(20B) | 11700    | 5327     | -1650    | 71    |
| H(21A) | 7676     | 5786     | -4047    | 73    |
| H(21B) | 9824     | 6109     | -4483    | 73    |



Table S5. Torsion angles [°] for AB.

---

|                         |             |
|-------------------------|-------------|
| C(9)-N(1)-C(2)-N(3)     | -0.56(15)   |
| C(10)-N(1)-C(2)-N(3)    | 179.94(11)  |
| N(1)-C(2)-N(3)-C(4)     | 0.10(15)    |
| C(2)-N(3)-C(4)-C(5)     | 177.83(14)  |
| C(2)-N(3)-C(4)-C(9)     | 0.40(14)    |
| N(3)-C(4)-C(5)-C(6)     | -177.13(16) |
| C(9)-C(4)-C(5)-C(6)     | 0.1(2)      |
| C(4)-C(5)-C(6)-C(7)     | 1.3(3)      |
| C(5)-C(6)-C(7)-C(8)     | -1.5(3)     |
| C(6)-C(7)-C(8)-C(9)     | 0.2(3)      |
| C(2)-N(1)-C(9)-C(8)     | -175.94(14) |
| C(10)-N(1)-C(9)-C(8)    | 3.6(2)      |
| C(2)-N(1)-C(9)-C(4)     | 0.75(13)    |
| C(10)-N(1)-C(9)-C(4)    | -179.74(11) |
| C(7)-C(8)-C(9)-N(1)     | 177.41(14)  |
| C(7)-C(8)-C(9)-C(4)     | 1.2(2)      |
| N(3)-C(4)-C(9)-N(1)     | -0.73(14)   |
| C(5)-C(4)-C(9)-N(1)     | -178.47(12) |
| N(3)-C(4)-C(9)-C(8)     | 176.36(12)  |
| C(5)-C(4)-C(9)-C(8)     | -1.4(2)     |
| C(2)-N(1)-C(10)-C(11)   | -105.17(15) |
| C(9)-N(1)-C(10)-C(11)   | 75.42(15)   |
| N(1)-C(10)-C(11)-C(12)  | -171.99(10) |
| C(10)-C(11)-C(12)-C(18) | 178.62(11)  |
| C(10)-C(11)-C(12)-C(17) | -61.61(14)  |
| C(10)-C(11)-C(12)-C(13) | 59.64(14)   |
| C(11)-C(12)-C(13)-C(14) | 177.69(10)  |
| C(18)-C(12)-C(13)-C(14) | 58.10(13)   |
| C(17)-C(12)-C(13)-C(14) | -58.65(13)  |
| C(12)-C(13)-C(14)-C(15) | 60.26(14)   |
| C(12)-C(13)-C(14)-C(20) | -60.24(14)  |
| C(13)-C(14)-C(15)-C(16) | -60.65(15)  |
| C(20)-C(14)-C(15)-C(16) | 59.73(15)   |
| C(14)-C(15)-C(16)-C(21) | -59.39(15)  |

|                         |             |
|-------------------------|-------------|
| C(14)-C(15)-C(16)-C(17) | 60.51(15)   |
| C(15)-C(16)-C(17)-C(12) | -60.00(14)  |
| C(21)-C(16)-C(17)-C(12) | 59.86(15)   |
| C(11)-C(12)-C(17)-C(16) | -178.60(10) |
| C(18)-C(12)-C(17)-C(16) | -58.27(14)  |
| C(13)-C(12)-C(17)-C(16) | 58.45(13)   |
| C(11)-C(12)-C(18)-C(19) | -178.91(11) |
| C(17)-C(12)-C(18)-C(19) | 58.74(14)   |
| C(13)-C(12)-C(18)-C(19) | -58.04(14)  |
| C(12)-C(18)-C(19)-C(21) | -60.21(14)  |
| C(12)-C(18)-C(19)-C(20) | 59.83(15)   |
| C(21)-C(19)-C(20)-C(14) | 59.92(15)   |
| C(18)-C(19)-C(20)-C(14) | -59.77(16)  |
| C(15)-C(14)-C(20)-C(19) | -59.78(16)  |
| C(13)-C(14)-C(20)-C(19) | 60.24(15)   |
| C(20)-C(19)-C(21)-C(16) | -60.01(15)  |
| C(18)-C(19)-C(21)-C(16) | 59.89(15)   |
| C(15)-C(16)-C(21)-C(19) | 59.51(15)   |
| C(17)-C(16)-C(21)-C(19) | -60.05(16)  |

---

Symmetry transformations used to generate equivalent atoms:

Table S6. Atomic coordinates ( $\times 10^4$ ) and equivalent isotropic displacement parameters ( $\text{\AA}^2 \times 10^3$ ) for tClAB.  $U(\text{eq})$  is defined as one third of the trace of the orthogonalized  $U^{ij}$  tensor.

|       | x       | y        | z        | U(eq)  |
|-------|---------|----------|----------|--------|
| Cl(1) | 1924(1) | 9752(1)  | -2668(1) | 100(1) |
| Cl(2) | 2133(1) | 8011(1)  | -445(1)  | 98(1)  |
| Cl(3) | 4051(1) | 7257(1)  | 763(1)   | 96(1)  |
| Cl(4) | 5780(1) | 8281(1)  | -87(1)   | 72(1)  |
| N(1)  | 5195(2) | 10052(2) | -2421(3) | 61(1)  |
| C(2)  | 4685(3) | 10652(3) | -3257(4) | 69(1)  |
| N(3)  | 3797(2) | 10537(3) | -3307(3) | 74(1)  |
| C(4)  | 3742(2) | 9769(3)  | -2359(3) | 54(1)  |
| C(5)  | 2974(2) | 9324(3)  | -1946(3) | 60(1)  |
| C(6)  | 3077(2) | 8560(3)  | -988(4)  | 63(1)  |
| C(7)  | 3944(3) | 8239(3)  | -437(3)  | 61(1)  |
| C(8)  | 4717(2) | 8682(3)  | -824(3)  | 54(1)  |
| C(9)  | 4604(2) | 9446(2)  | -1795(3) | 50(1)  |
| C(10) | 6198(2) | 10051(3) | -2249(4) | 64(1)  |
| C(11) | 6584(2) | 9097(3)  | -2924(3) | 59(1)  |
| C(12) | 7630(2) | 9102(3)  | -2806(3) | 51(1)  |
| C(13) | 8074(2) | 9043(4)  | -1437(3) | 68(1)  |
| C(14) | 9114(3) | 9015(4)  | -1378(4) | 81(1)  |
| C(15) | 9429(3) | 10057(4) | -1971(5) | 83(1)  |
| C(16) | 9001(3) | 10114(3) | -3347(4) | 76(1)  |
| C(17) | 7968(3) | 10135(3) | -3408(4) | 65(1)  |
| C(18) | 7928(3) | 8082(3)  | -3504(4) | 68(1)  |
| C(19) | 8963(3) | 8052(4)  | -3452(4) | 76(1)  |
| C(20) | 9394(3) | 8007(4)  | -2071(5) | 89(1)  |
| C(21) | 9275(3) | 9093(4)  | -4044(4) | 83(1)  |

Table S7. Bond lengths [ $\text{\AA}$ ] and angles [ $^\circ$ ] for tClAB.

|              |          |
|--------------|----------|
| Cl(1)-C(5)   | 1.723(3) |
| Cl(2)-C(6)   | 1.728(3) |
| Cl(3)-C(7)   | 1.735(3) |
| Cl(4)-C(8)   | 1.735(3) |
| N(1)-C(2)    | 1.306(5) |
| N(1)-C(9)    | 1.386(4) |
| N(1)-C(10)   | 1.480(4) |
| C(2)-N(3)    | 1.324(5) |
| C(2)-H(2)    | 0.9300   |
| N(3)-C(4)    | 1.382(4) |
| C(4)-C(5)    | 1.390(5) |
| C(4)-C(9)    | 1.396(4) |
| C(5)-C(6)    | 1.369(5) |
| C(6)-C(7)    | 1.396(5) |
| C(7)-C(8)    | 1.384(5) |
| C(8)-C(9)    | 1.379(5) |
| C(10)-C(11)  | 1.512(5) |
| C(10)-H(10A) | 0.9700   |
| C(10)-H(10B) | 0.9700   |
| C(11)-C(12)  | 1.545(4) |
| C(11)-H(11A) | 0.9700   |
| C(11)-H(11B) | 0.9700   |
| C(12)-C(17)  | 1.517(5) |
| C(12)-C(13)  | 1.522(5) |
| C(12)-C(18)  | 1.533(4) |
| C(13)-C(14)  | 1.542(5) |
| C(13)-H(13A) | 0.9700   |
| C(13)-H(13B) | 0.9700   |
| C(14)-C(15)  | 1.509(7) |
| C(14)-C(20)  | 1.509(7) |
| C(14)-H(14)  | 0.9800   |
| C(15)-C(16)  | 1.521(6) |
| C(15)-H(15A) | 0.9700   |
| C(15)-H(15B) | 0.9700   |

|                 |          |
|-----------------|----------|
| C(16)-C(21)     | 1.521(6) |
| C(16)-C(17)     | 1.531(5) |
| C(16)-H(16)     | 0.9800   |
| C(17)-H(17A)    | 0.9700   |
| C(17)-H(17B)    | 0.9700   |
| C(18)-C(19)     | 1.535(5) |
| C(18)-H(18A)    | 0.9700   |
| C(18)-H(18B)    | 0.9700   |
| C(19)-C(21)     | 1.506(6) |
| C(19)-C(20)     | 1.528(6) |
| C(19)-H(19)     | 0.9800   |
| C(20)-H(20A)    | 0.9700   |
| C(20)-H(20B)    | 0.9700   |
| C(21)-H(21A)    | 0.9700   |
| C(21)-H(21B)    | 0.9700   |
| C(2)-N(1)-C(9)  | 105.8(3) |
| C(2)-N(1)-C(10) | 124.5(3) |
| C(9)-N(1)-C(10) | 129.7(3) |
| N(1)-C(2)-N(3)  | 116.9(3) |
| N(1)-C(2)-H(2)  | 121.6    |
| N(3)-C(2)-H(2)  | 121.6    |
| C(2)-N(3)-C(4)  | 101.6(3) |
| N(3)-C(4)-C(5)  | 128.8(3) |
| N(3)-C(4)-C(9)  | 110.9(3) |
| C(5)-C(4)-C(9)  | 120.3(3) |
| C(6)-C(5)-C(4)  | 119.0(3) |
| C(6)-C(5)-Cl(1) | 122.4(3) |
| C(4)-C(5)-Cl(1) | 118.6(3) |
| C(5)-C(6)-C(7)  | 120.1(3) |
| C(5)-C(6)-Cl(2) | 119.8(3) |
| C(7)-C(6)-Cl(2) | 120.1(3) |
| C(8)-C(7)-C(6)  | 121.8(3) |
| C(8)-C(7)-Cl(3) | 119.3(3) |
| C(6)-C(7)-Cl(3) | 118.9(3) |
| C(9)-C(8)-C(7)  | 117.6(3) |
| C(9)-C(8)-Cl(4) | 122.3(3) |

|                     |          |
|---------------------|----------|
| C(7)-C(8)-Cl(4)     | 120.1(3) |
| C(8)-C(9)-N(1)      | 134.1(3) |
| C(8)-C(9)-C(4)      | 121.2(3) |
| N(1)-C(9)-C(4)      | 104.7(3) |
| N(1)-C(10)-C(11)    | 112.7(3) |
| N(1)-C(10)-H(10A)   | 109.0    |
| C(11)-C(10)-H(10A)  | 109.0    |
| N(1)-C(10)-H(10B)   | 109.0    |
| C(11)-C(10)-H(10B)  | 109.0    |
| H(10A)-C(10)-H(10B) | 107.8    |
| C(10)-C(11)-C(12)   | 113.9(3) |
| C(10)-C(11)-H(11A)  | 108.8    |
| C(12)-C(11)-H(11A)  | 108.8    |
| C(10)-C(11)-H(11B)  | 108.8    |
| C(12)-C(11)-H(11B)  | 108.8    |
| H(11A)-C(11)-H(11B) | 107.7    |
| C(17)-C(12)-C(13)   | 108.7(3) |
| C(17)-C(12)-C(18)   | 108.1(3) |
| C(13)-C(12)-C(18)   | 108.3(3) |
| C(17)-C(12)-C(11)   | 111.1(3) |
| C(13)-C(12)-C(11)   | 112.1(3) |
| C(18)-C(12)-C(11)   | 108.4(3) |
| C(12)-C(13)-C(14)   | 109.8(3) |
| C(12)-C(13)-H(13A)  | 109.7    |
| C(14)-C(13)-H(13A)  | 109.7    |
| C(12)-C(13)-H(13B)  | 109.7    |
| C(14)-C(13)-H(13B)  | 109.7    |
| H(13A)-C(13)-H(13B) | 108.2    |
| C(15)-C(14)-C(20)   | 109.6(4) |
| C(15)-C(14)-C(13)   | 109.6(4) |
| C(20)-C(14)-C(13)   | 110.1(4) |
| C(15)-C(14)-H(14)   | 109.2    |
| C(20)-C(14)-H(14)   | 109.2    |
| C(13)-C(14)-H(14)   | 109.2    |
| C(14)-C(15)-C(16)   | 109.3(3) |
| C(14)-C(15)-H(15A)  | 109.8    |

|                     |          |
|---------------------|----------|
| C(16)-C(15)-H(15A)  | 109.8    |
| C(14)-C(15)-H(15B)  | 109.8    |
| C(16)-C(15)-H(15B)  | 109.8    |
| H(15A)-C(15)-H(15B) | 108.3    |
| C(21)-C(16)-C(15)   | 109.5(4) |
| C(21)-C(16)-C(17)   | 109.3(3) |
| C(15)-C(16)-C(17)   | 108.9(3) |
| C(21)-C(16)-H(16)   | 109.7    |
| C(15)-C(16)-H(16)   | 109.7    |
| C(17)-C(16)-H(16)   | 109.7    |
| C(12)-C(17)-C(16)   | 111.1(3) |
| C(12)-C(17)-H(17A)  | 109.4    |
| C(16)-C(17)-H(17A)  | 109.4    |
| C(12)-C(17)-H(17B)  | 109.4    |
| C(16)-C(17)-H(17B)  | 109.4    |
| H(17A)-C(17)-H(17B) | 108.0    |
| C(12)-C(18)-C(19)   | 111.1(3) |
| C(12)-C(18)-H(18A)  | 109.4    |
| C(19)-C(18)-H(18A)  | 109.4    |
| C(12)-C(18)-H(18B)  | 109.4    |
| C(19)-C(18)-H(18B)  | 109.4    |
| H(18A)-C(18)-H(18B) | 108.0    |
| C(21)-C(19)-C(20)   | 108.9(4) |
| C(21)-C(19)-C(18)   | 109.5(3) |
| C(20)-C(19)-C(18)   | 108.7(3) |
| C(21)-C(19)-H(19)   | 109.9    |
| C(20)-C(19)-H(19)   | 109.9    |
| C(18)-C(19)-H(19)   | 109.9    |
| C(14)-C(20)-C(19)   | 109.8(3) |
| C(14)-C(20)-H(20A)  | 109.7    |
| C(19)-C(20)-H(20A)  | 109.7    |
| C(14)-C(20)-H(20B)  | 109.7    |
| C(19)-C(20)-H(20B)  | 109.7    |
| H(20A)-C(20)-H(20B) | 108.2    |
| C(19)-C(21)-C(16)   | 110.1(3) |
| C(19)-C(21)-H(21A)  | 109.6    |

|                     |       |
|---------------------|-------|
| C(16)-C(21)-H(21A)  | 109.6 |
| C(19)-C(21)-H(21B)  | 109.6 |
| C(16)-C(21)-H(21B)  | 109.6 |
| H(21A)-C(21)-H(21B) | 108.2 |

---



Table S8. Anisotropic displacement parameters ( $\text{\AA}^2 \times 10^3$ ) for tClAB. The anisotropic displacement factor exponent takes the form:  $-2\pi^2 [h^2 a^{*2} U^{11} + \dots + 2 h k a^* b^* U^{12}]$

|       | U <sup>11</sup> | U <sup>22</sup> | U <sup>33</sup> | U <sup>23</sup> | U <sup>13</sup> | U <sup>12</sup> |
|-------|-----------------|-----------------|-----------------|-----------------|-----------------|-----------------|
| Cl(1) | 47(1)           | 125(1)          | 122(1)          | 1(1)            | -1(1)           | 8(1)            |
| Cl(2) | 93(1)           | 79(1)           | 137(1)          | -15(1)          | 64(1)           | -21(1)          |
| Cl(3) | 138(1)          | 72(1)           | 87(1)           | 25(1)           | 48(1)           | 19(1)           |
| Cl(4) | 72(1)           | 72(1)           | 67(1)           | -1(1)           | -5(1)           | 22(1)           |
| N(1)  | 49(2)           | 57(2)           | 76(2)           | -1(1)           | 12(1)           | -1(1)           |
| C(2)  | 76(2)           | 60(2)           | 73(2)           | 18(2)           | 23(2)           | 0(2)            |
| N(3)  | 70(2)           | 76(2)           | 74(2)           | 19(2)           | 7(2)            | 9(2)            |
| C(4)  | 55(2)           | 54(2)           | 52(2)           | 0(1)            | 5(1)            | 4(1)            |
| C(5)  | 47(2)           | 65(2)           | 67(2)           | -15(2)          | 8(1)            | 2(1)            |
| C(6)  | 65(2)           | 53(2)           | 76(2)           | -17(2)          | 31(2)           | -9(2)           |
| C(7)  | 90(2)           | 44(2)           | 53(2)           | -2(1)           | 23(2)           | 6(2)            |
| C(8)  | 58(2)           | 50(2)           | 53(2)           | -10(1)          | 2(1)            | 12(1)           |
| C(9)  | 48(2)           | 49(2)           | 54(2)           | -11(1)          | 11(1)           | 0(1)            |
| C(10) | 46(2)           | 58(2)           | 89(2)           | -12(2)          | 14(2)           | -4(1)           |
| C(11) | 51(2)           | 62(2)           | 65(2)           | -11(2)          | 10(1)           | -6(1)           |
| C(12) | 46(2)           | 54(2)           | 52(2)           | -7(1)           | 10(1)           | -5(1)           |
| C(13) | 61(2)           | 90(3)           | 53(2)           | 4(2)            | 11(2)           | -5(2)           |
| C(14) | 61(2)           | 122(4)          | 55(2)           | 1(2)            | -6(2)           | 3(2)            |
| C(15) | 50(2)           | 100(3)          | 100(3)          | -21(2)          | 13(2)           | -16(2)          |
| C(16) | 62(2)           | 73(2)           | 98(3)           | 16(2)           | 29(2)           | -8(2)           |
| C(17) | 60(2)           | 65(2)           | 73(2)           | 8(2)            | 17(2)           | 2(2)            |
| C(18) | 62(2)           | 67(2)           | 76(2)           | -19(2)          | 14(2)           | 1(2)            |
| C(19) | 66(2)           | 77(2)           | 86(3)           | -15(2)          | 18(2)           | 14(2)           |
| C(20) | 66(2)           | 100(3)          | 99(3)           | 22(3)           | 7(2)            | 20(2)           |
| C(21) | 66(2)           | 117(4)          | 72(2)           | 3(2)            | 27(2)           | 9(2)            |

Table S9. Hydrogen coordinates ( $\times 10^4$ ) and isotropic displacement parameters ( $\text{\AA}^2 \times 10^3$ ) for tClAB.

|        | x     | y     | z     | U(eq) |
|--------|-------|-------|-------|-------|
| H(2)   | 4934  | 11138 | -3792 | 82    |
| H(10A) | 6423  | 10006 | -1355 | 77    |
| H(10B) | 6409  | 10748 | -2563 | 77    |
| H(11A) | 6335  | 9125  | -3811 | 71    |
| H(11B) | 6391  | 8402  | -2585 | 71    |
| H(13A) | 7871  | 8379  | -1043 | 81    |
| H(13B) | 7898  | 9686  | -980  | 81    |
| H(14)  | 9393  | 8978  | -494  | 97    |
| H(15A) | 10084 | 10051 | -1918 | 100   |
| H(15B) | 9256  | 10706 | -1522 | 100   |
| H(16)  | 9204  | 10789 | -3738 | 91    |
| H(17A) | 7791  | 10790 | -2973 | 78    |
| H(17B) | 7690  | 10180 | -4282 | 78    |
| H(18A) | 7646  | 8103  | -4378 | 82    |
| H(18B) | 7728  | 7410  | -3123 | 82    |
| H(19)  | 9141  | 7395  | -3903 | 91    |
| H(20A) | 9203  | 7336  | -1680 | 107   |
| H(20B) | 10049 | 7989  | -2022 | 107   |
| H(21A) | 9007  | 9130  | -4924 | 100   |
| H(21B) | 9929  | 9077  | -4011 | 100   |

Table S10. Torsion angles [°] for tClAB.

---

|                       |           |
|-----------------------|-----------|
| C(9)-N(1)-C(2)-N(3)   | -0.6(5)   |
| C(10)-N(1)-C(2)-N(3)  | 178.6(3)  |
| N(1)-C(2)-N(3)-C(4)   | 0.9(5)    |
| C(2)-N(3)-C(4)-C(5)   | 179.1(4)  |
| C(2)-N(3)-C(4)-C(9)   | -0.9(4)   |
| N(3)-C(4)-C(5)-C(6)   | 179.5(3)  |
| C(9)-C(4)-C(5)-C(6)   | -0.5(5)   |
| N(3)-C(4)-C(5)-Cl(1)  | -0.1(5)   |
| C(9)-C(4)-C(5)-Cl(1)  | 179.8(2)  |
| C(4)-C(5)-C(6)-C(7)   | 0.2(5)    |
| Cl(1)-C(5)-C(6)-C(7)  | 179.8(3)  |
| C(4)-C(5)-C(6)-Cl(2)  | 179.1(2)  |
| Cl(1)-C(5)-C(6)-Cl(2) | -1.2(4)   |
| C(5)-C(6)-C(7)-C(8)   | 0.6(5)    |
| Cl(2)-C(6)-C(7)-C(8)  | -178.3(2) |
| C(5)-C(6)-C(7)-Cl(3)  | -179.3(3) |
| Cl(2)-C(6)-C(7)-Cl(3) | 1.8(4)    |
| C(6)-C(7)-C(8)-C(9)   | -1.1(5)   |
| Cl(3)-C(7)-C(8)-C(9)  | 178.9(2)  |
| C(6)-C(7)-C(8)-Cl(4)  | 178.6(2)  |
| Cl(3)-C(7)-C(8)-Cl(4) | -1.5(4)   |
| C(7)-C(8)-C(9)-N(1)   | 179.9(3)  |
| Cl(4)-C(8)-C(9)-N(1)  | 0.3(5)    |
| C(7)-C(8)-C(9)-C(4)   | 0.7(4)    |
| Cl(4)-C(8)-C(9)-C(4)  | -178.9(2) |
| C(2)-N(1)-C(9)-C(8)   | -179.4(4) |
| C(10)-N(1)-C(9)-C(8)  | 1.6(6)    |
| C(2)-N(1)-C(9)-C(4)   | 0.0(4)    |
| C(10)-N(1)-C(9)-C(4)  | -179.1(3) |
| N(3)-C(4)-C(9)-C(8)   | -180.0(3) |
| C(5)-C(4)-C(9)-C(8)   | 0.1(5)    |
| N(3)-C(4)-C(9)-N(1)   | 0.6(4)    |
| C(5)-C(4)-C(9)-N(1)   | -179.3(3) |
| C(2)-N(1)-C(10)-C(11) | -97.4(4)  |

|                         |           |
|-------------------------|-----------|
| C(9)-N(1)-C(10)-C(11)   | 81.5(5)   |
| N(1)-C(10)-C(11)-C(12)  | 177.6(3)  |
| C(10)-C(11)-C(12)-C(17) | -62.6(4)  |
| C(10)-C(11)-C(12)-C(13) | 59.3(4)   |
| C(10)-C(11)-C(12)-C(18) | 178.8(3)  |
| C(17)-C(12)-C(13)-C(14) | -58.5(4)  |
| C(18)-C(12)-C(13)-C(14) | 58.8(4)   |
| C(11)-C(12)-C(13)-C(14) | 178.3(3)  |
| C(12)-C(13)-C(14)-C(15) | 60.4(4)   |
| C(12)-C(13)-C(14)-C(20) | -60.2(4)  |
| C(20)-C(14)-C(15)-C(16) | 60.1(4)   |
| C(13)-C(14)-C(15)-C(16) | -60.8(4)  |
| C(14)-C(15)-C(16)-C(21) | -59.4(4)  |
| C(14)-C(15)-C(16)-C(17) | 60.0(4)   |
| C(13)-C(12)-C(17)-C(16) | 58.9(4)   |
| C(18)-C(12)-C(17)-C(16) | -58.5(4)  |
| C(11)-C(12)-C(17)-C(16) | -177.3(3) |
| C(21)-C(16)-C(17)-C(12) | 59.8(4)   |
| C(15)-C(16)-C(17)-C(12) | -59.7(4)  |
| C(17)-C(12)-C(18)-C(19) | 58.1(4)   |
| C(13)-C(12)-C(18)-C(19) | -59.6(4)  |
| C(11)-C(12)-C(18)-C(19) | 178.6(3)  |
| C(12)-C(18)-C(19)-C(21) | -59.1(4)  |
| C(12)-C(18)-C(19)-C(20) | 59.6(5)   |
| C(15)-C(14)-C(20)-C(19) | -60.5(5)  |
| C(13)-C(14)-C(20)-C(19) | 60.1(5)   |
| C(21)-C(19)-C(20)-C(14) | 59.9(5)   |
| C(18)-C(19)-C(20)-C(14) | -59.2(5)  |
| C(20)-C(19)-C(21)-C(16) | -59.5(4)  |
| C(18)-C(19)-C(21)-C(16) | 59.2(5)   |
| C(15)-C(16)-C(21)-C(19) | 59.7(4)   |
| C(17)-C(16)-C(21)-C(19) | -59.5(4)  |

---

Table S11. Atomic coordinates ( $\times 10^4$ ) and equivalent isotropic displacement parameters ( $\text{\AA}^2 \times 10^3$ ) for tBrAB. U(eq) is defined as one third of the trace of the orthogonalized  $U^{ij}$  tensor.

|       | x         | y        | z         | U(eq)  |
|-------|-----------|----------|-----------|--------|
| Br(1) | -3048(1)  | 4891(2)  | -2788(2)  | 103(1) |
| Br(2) | -2958(1)  | 3049(2)  | -514(2)   | 102(1) |
| Br(3) | -1006(2)  | 2209(2)  | 776(2)    | 100(1) |
| Br(4) | 840(1)    | 3232(1)  | -53(1)    | 77(1)  |
| N(1)  | 243(7)    | 5043(9)  | -2388(12) | 68(3)  |
| C(2)  | -58(13)   | 5596(9)  | -3162(12) | 84(5)  |
| N(3)  | -1103(9)  | 5539(11) | -3282(12) | 81(3)  |
| C(4)  | -1210(9)  | 4802(10) | -2356(12) | 63(3)  |
| C(5)  | -1949(8)  | 4375(12) | -1944(13) | 66(3)  |
| C(6)  | -1891(8)  | 3618(11) | -1058(14) | 70(4)  |
| C(7)  | -1081(11) | 3279(9)  | -485(11)  | 68(3)  |
| C(8)  | -264(8)   | 3713(9)  | -863(10)  | 59(3)  |
| C(9)  | -355(7)   | 4474(8)  | -1813(10) | 52(2)  |
| C(10) | 1242(8)   | 5049(12) | -2246(15) | 74(3)  |
| C(11) | 1628(8)   | 4131(11) | -2920(12) | 63(3)  |
| C(12) | 2667(7)   | 4071(10) | -2737(12) | 59(3)  |
| C(13) | 3064(10)  | 3978(14) | -1421(13) | 78(4)  |
| C(14) | 4105(12)  | 3916(17) | -1336(15) | 90(5)  |
| C(15) | 4450(11)  | 5000(17) | -1881(19) | 97(5)  |
| C(16) | 4081(11)  | 5083(15) | -3196(18) | 90(5)  |
| C(17) | 3074(11)  | 5127(13) | -3303(15) | 77(4)  |
| C(18) | 2998(9)   | 3091(12) | -3475(15) | 71(3)  |
| C(19) | 3988(12)  | 3090(14) | -3421(16) | 89(5)  |
| C(20) | 4351(12)  | 2963(17) | -2040(20) | 101(5) |
| C(21) | 4338(12)  | 4127(17) | -3898(16) | 94(5)  |

Table S12. Bond lengths [ $\text{\AA}$ ] and angles [ $^\circ$ ] for tBrAB.

|              |           |
|--------------|-----------|
| Br(1)-C(5)   | 1.907(13) |
| Br(2)-C(6)   | 1.912(11) |
| Br(3)-C(7)   | 1.889(12) |
| Br(4)-C(8)   | 1.887(11) |
| N(1)-C(2)    | 1.130(19) |
| N(1)-C(9)    | 1.351(16) |
| N(1)-C(10)   | 1.499(16) |
| C(2)-N(3)    | 1.57(2)   |
| C(2)-H(2)    | 0.9300    |
| N(3)-C(4)    | 1.374(18) |
| C(4)-C(5)    | 1.356(18) |
| C(4)-C(9)    | 1.414(17) |
| C(5)-C(6)    | 1.33(2)   |
| C(6)-C(7)    | 1.37(2)   |
| C(7)-C(8)    | 1.45(2)   |
| C(8)-C(9)    | 1.383(16) |
| C(10)-C(11)  | 1.50(2)   |
| C(10)-H(10A) | 0.9700    |
| C(10)-H(10B) | 0.9700    |
| C(11)-C(12)  | 1.562(15) |
| C(11)-H(11A) | 0.9700    |
| C(11)-H(11B) | 0.9700    |
| C(12)-C(13)  | 1.48(2)   |
| C(12)-C(18)  | 1.561(17) |
| C(12)-C(17)  | 1.591(19) |
| C(13)-C(14)  | 1.57(2)   |
| C(13)-H(13A) | 0.9700    |
| C(13)-H(13B) | 0.9700    |
| C(14)-C(20)  | 1.47(3)   |
| C(14)-C(15)  | 1.57(3)   |
| C(14)-H(14)  | 0.9800    |
| C(15)-C(16)  | 1.46(3)   |
| C(15)-H(15A) | 0.9700    |
| C(15)-H(15B) | 0.9700    |

|              |         |
|--------------|---------|
| C(16)-C(21)  | 1.48(3) |
| C(16)-C(17)  | 1.51(2) |
| C(16)-H(16)  | 0.9800  |
| C(17)-H(17A) | 0.9700  |
| C(17)-H(17B) | 0.9700  |
| C(18)-C(19)  | 1.49(2) |
| C(18)-H(18A) | 0.9700  |
| C(18)-H(18B) | 0.9700  |
| C(19)-C(21)  | 1.50(3) |
| C(19)-C(20)  | 1.53(3) |
| C(19)-H(19)  | 0.9800  |
| C(20)-H(20A) | 0.9700  |
| C(20)-H(20B) | 0.9700  |
| C(21)-H(21A) | 0.9700  |
| C(21)-H(21B) | 0.9700  |

|                 |           |
|-----------------|-----------|
| C(2)-N(1)-C(9)  | 114.8(13) |
| C(2)-N(1)-C(10) | 112.6(13) |
| C(9)-N(1)-C(10) | 132.4(12) |
| N(1)-C(2)-N(3)  | 110.3(10) |
| N(1)-C(2)-H(2)  | 124.9     |
| N(3)-C(2)-H(2)  | 124.9     |
| C(4)-N(3)-C(2)  | 99.9(10)  |
| C(5)-C(4)-N(3)  | 131.8(13) |
| C(5)-C(4)-C(9)  | 120.0(12) |
| N(3)-C(4)-C(9)  | 108.1(11) |
| C(6)-C(5)-C(4)  | 121.4(12) |
| C(6)-C(5)-Br(1) | 123.8(9)  |
| C(4)-C(5)-Br(1) | 114.8(11) |
| C(5)-C(6)-C(7)  | 121.1(11) |
| C(5)-C(6)-Br(2) | 119.4(11) |
| C(7)-C(6)-Br(2) | 119.4(11) |
| C(6)-C(7)-C(8)  | 120.5(11) |
| C(6)-C(7)-Br(3) | 120.8(10) |
| C(8)-C(7)-Br(3) | 118.7(11) |
| C(9)-C(8)-C(7)  | 116.5(10) |

|                     |           |
|---------------------|-----------|
| C(9)-C(8)-Br(4)     | 124.1(10) |
| C(7)-C(8)-Br(4)     | 119.4(9)  |
| N(1)-C(9)-C(8)      | 132.8(11) |
| N(1)-C(9)-C(4)      | 106.8(11) |
| C(8)-C(9)-C(4)      | 120.4(11) |
| N(1)-C(10)-C(11)    | 113.0(11) |
| N(1)-C(10)-H(10A)   | 109.0     |
| C(11)-C(10)-H(10A)  | 109.0     |
| N(1)-C(10)-H(10B)   | 109.0     |
| C(11)-C(10)-H(10B)  | 109.0     |
| H(10A)-C(10)-H(10B) | 107.8     |
| C(10)-C(11)-C(12)   | 114.6(10) |
| C(10)-C(11)-H(11A)  | 108.6     |
| C(12)-C(11)-H(11A)  | 108.6     |
| C(10)-C(11)-H(11B)  | 108.6     |
| C(12)-C(11)-H(11B)  | 108.6     |
| H(11A)-C(11)-H(11B) | 107.6     |
| C(13)-C(12)-C(18)   | 108.2(12) |
| C(13)-C(12)-C(11)   | 114.4(10) |
| C(18)-C(12)-C(11)   | 110.5(10) |
| C(13)-C(12)-C(17)   | 107.5(11) |
| C(18)-C(12)-C(17)   | 106.0(10) |
| C(11)-C(12)-C(17)   | 110.0(11) |
| C(12)-C(13)-C(14)   | 110.5(11) |
| C(12)-C(13)-H(13A)  | 109.5     |
| C(14)-C(13)-H(13A)  | 109.5     |
| C(12)-C(13)-H(13B)  | 109.5     |
| C(14)-C(13)-H(13B)  | 109.5     |
| H(13A)-C(13)-H(13B) | 108.1     |
| C(20)-C(14)-C(13)   | 108.7(15) |
| C(20)-C(14)-C(15)   | 111.7(15) |
| C(13)-C(14)-C(15)   | 108.1(15) |
| C(20)-C(14)-H(14)   | 109.4     |
| C(13)-C(14)-H(14)   | 109.4     |
| C(15)-C(14)-H(14)   | 109.4     |
| C(16)-C(15)-C(14)   | 108.4(15) |



|                     |           |
|---------------------|-----------|
| C(16)-C(15)-H(15A)  | 110.0     |
| C(14)-C(15)-H(15A)  | 110.0     |
| C(16)-C(15)-H(15B)  | 110.0     |
| C(14)-C(15)-H(15B)  | 110.0     |
| H(15A)-C(15)-H(15B) | 108.4     |
| C(15)-C(16)-C(21)   | 110.3(16) |
| C(15)-C(16)-C(17)   | 110.0(13) |
| C(21)-C(16)-C(17)   | 108.2(15) |
| C(15)-C(16)-H(16)   | 109.4     |
| C(21)-C(16)-H(16)   | 109.4     |
| C(17)-C(16)-H(16)   | 109.4     |
| C(16)-C(17)-C(12)   | 111.8(12) |
| C(16)-C(17)-H(17A)  | 109.3     |
| C(12)-C(17)-H(17A)  | 109.3     |
| C(16)-C(17)-H(17B)  | 109.3     |
| C(12)-C(17)-H(17B)  | 109.3     |
| H(17A)-C(17)-H(17B) | 107.9     |
| C(19)-C(18)-C(12)   | 111.2(11) |
| C(19)-C(18)-H(18A)  | 109.4     |
| C(12)-C(18)-H(18A)  | 109.4     |
| C(19)-C(18)-H(18B)  | 109.4     |
| C(12)-C(18)-H(18B)  | 109.4     |
| H(18A)-C(18)-H(18B) | 108.0     |
| C(18)-C(19)-C(21)   | 112.3(14) |
| C(18)-C(19)-C(20)   | 106.4(14) |
| C(21)-C(19)-C(20)   | 108.7(16) |
| C(18)-C(19)-H(19)   | 109.8     |
| C(21)-C(19)-H(19)   | 109.8     |
| C(20)-C(19)-H(19)   | 109.8     |
| C(14)-C(20)-C(19)   | 109.8(14) |
| C(14)-C(20)-H(20A)  | 109.7     |
| C(19)-C(20)-H(20A)  | 109.7     |
| C(14)-C(20)-H(20B)  | 109.7     |
| C(19)-C(20)-H(20B)  | 109.7     |
| H(20A)-C(20)-H(20B) | 108.2     |
| C(16)-C(21)-C(19)   | 112.3(12) |

|                     |       |
|---------------------|-------|
| C(16)-C(21)-H(21A)  | 109.1 |
| C(19)-C(21)-H(21A)  | 109.1 |
| C(16)-C(21)-H(21B)  | 109.1 |
| C(19)-C(21)-H(21B)  | 109.1 |
| H(21A)-C(21)-H(21B) | 107.9 |

---

Table S13. Anisotropic displacement parameters ( $\text{\AA}^2 \times 10^3$ ) for tBrAB. The anisotropic displacement factor exponent takes the form:  $-2\pi^2 [h^2 a^{*2} U^{11} + \dots + 2 h k a^* b^* U^{12}]$

|       | $U^{11}$ | $U^{22}$ | $U^{33}$ | $U^{23}$ | $U^{13}$ | $U^{12}$ |
|-------|----------|----------|----------|----------|----------|----------|
| Br(1) | 61(1)    | 132(2)   | 115(2)   | 11(1)    | -1(1)    | 14(1)    |
| Br(2) | 94(1)    | 92(1)    | 129(2)   | -10(1)   | 55(1)    | -15(1)   |
| Br(3) | 141(2)   | 80(1)    | 89(1)    | 26(1)    | 51(1)    | 24(1)    |
| Br(4) | 81(1)    | 82(1)    | 66(1)    | 1(1)     | 1(1)     | 24(1)    |
| N(1)  | 54(5)    | 57(6)    | 94(8)    | -12(6)   | 14(5)    | -3(4)    |
| C(2)  | 172(15)  | 37(5)    | 53(6)    | 21(5)    | 58(8)    | -14(7)   |
| N(3)  | 74(7)    | 88(8)    | 79(7)    | 19(6)    | 9(6)     | 10(6)    |
| C(4)  | 65(6)    | 54(6)    | 68(7)    | 3(5)     | -5(5)    | -2(5)    |
| C(5)  | 49(5)    | 81(8)    | 69(7)    | -10(6)   | 15(5)    | 3(5)     |
| C(6)  | 65(7)    | 63(7)    | 89(9)    | -30(7)   | 39(6)    | -9(5)    |
| C(7)  | 114(11)  | 51(6)    | 43(5)    | 1(4)     | 28(6)    | 4(6)     |
| C(8)  | 74(7)    | 55(6)    | 46(5)    | -3(4)    | -7(5)    | 17(5)    |
| C(9)  | 52(5)    | 50(5)    | 56(5)    | -12(4)   | 8(4)     | 3(4)     |
| C(10) | 49(6)    | 88(9)    | 86(9)    | 5(7)     | 18(6)    | -6(5)    |
| C(11) | 55(6)    | 70(7)    | 65(7)    | -3(5)    | 10(5)    | -13(5)   |
| C(12) | 51(5)    | 62(6)    | 66(6)    | -9(5)    | 13(5)    | -2(4)    |
| C(13) | 74(8)    | 97(10)   | 63(7)    | 7(7)     | 9(6)     | -15(7)   |
| C(14) | 82(9)    | 120(14)  | 68(8)    | 7(8)     | 3(7)     | 2(8)     |
| C(15) | 60(7)    | 125(14)  | 107(12)  | -32(11)  | 16(8)    | -3(8)    |
| C(16) | 78(9)    | 102(12)  | 95(11)   | 26(9)    | 24(8)    | -9(8)    |
| C(17) | 77(8)    | 79(9)    | 78(8)    | 8(7)     | 27(7)    | 2(6)     |
| C(18) | 68(7)    | 69(8)    | 77(8)    | -19(6)   | 10(6)    | 1(5)     |
| C(19) | 86(9)    | 97(11)   | 82(10)   | -32(8)   | 8(7)     | 22(8)    |
| C(20) | 74(9)    | 111(13)  | 114(14)  | 16(11)   | 3(9)     | 21(9)    |
| C(21) | 86(10)   | 127(14)  | 75(9)    | -4(9)    | 37(8)    | 2(9)     |

Table S14. Hydrogen coordinates ( $\times 10^4$ ) and isotropic displacement parameters ( $\text{\AA}^2 \times 10^3$ ) for tBrAB.

|        | x    | y    | z     | U(eq) |
|--------|------|------|-------|-------|
| H(2)   | 267  | 6023 | -3657 | 100   |
| H(10A) | 1462 | 5006 | -1365 | 88    |
| H(10B) | 1445 | 5730 | -2562 | 88    |
| H(11A) | 1429 | 4198 | -3805 | 76    |
| H(11B) | 1394 | 3453 | -2637 | 76    |
| H(13A) | 2838 | 3332 | -1053 | 93    |
| H(13B) | 2893 | 4602 | -954  | 93    |
| H(14)  | 4356 | 3841 | -460  | 108   |
| H(15A) | 4261 | 5616 | -1418 | 116   |
| H(15B) | 5095 | 4998 | -1810 | 116   |
| H(16)  | 4306 | 5743 | -3558 | 108   |
| H(17A) | 2838 | 5197 | -4175 | 92    |
| H(17B) | 2893 | 5762 | -2866 | 92    |
| H(18A) | 2804 | 2420 | -3125 | 86    |
| H(18B) | 2736 | 3131 | -4340 | 86    |
| H(19)  | 4180 | 2476 | -3900 | 106   |
| H(20A) | 4107 | 2312 | -1710 | 121   |
| H(20B) | 4994 | 2891 | -1964 | 121   |
| H(21A) | 4983 | 4088 | -3838 | 113   |
| H(21B) | 4112 | 4212 | -4772 | 113   |

Table S15. Torsion angles [°] for tBrAB.

---

|                       |            |
|-----------------------|------------|
| C(9)-N(1)-C(2)-N(3)   | 1.8(15)    |
| C(10)-N(1)-C(2)-N(3)  | 179.0(11)  |
| N(1)-C(2)-N(3)-C(4)   | -0.4(15)   |
| C(2)-N(3)-C(4)-C(5)   | -180.0(14) |
| C(2)-N(3)-C(4)-C(9)   | -1.1(13)   |
| N(3)-C(4)-C(5)-C(6)   | 176.5(14)  |
| C(9)-C(4)-C(5)-C(6)   | -2(2)      |
| N(3)-C(4)-C(5)-Br(1)  | 0(2)       |
| C(9)-C(4)-C(5)-Br(1)  | -179.3(9)  |
| C(4)-C(5)-C(6)-C(7)   | 3(2)       |
| Br(1)-C(5)-C(6)-C(7)  | 179.9(9)   |
| C(4)-C(5)-C(6)-Br(2)  | 179.9(10)  |
| Br(1)-C(5)-C(6)-Br(2) | -3.4(15)   |
| C(5)-C(6)-C(7)-C(8)   | -2.2(18)   |
| Br(2)-C(6)-C(7)-C(8)  | -178.8(8)  |
| C(5)-C(6)-C(7)-Br(3)  | 179.7(10)  |
| Br(2)-C(6)-C(7)-Br(3) | 3.1(13)    |
| C(6)-C(7)-C(8)-C(9)   | 0.2(16)    |
| Br(3)-C(7)-C(8)-C(9)  | 178.4(8)   |
| C(6)-C(7)-C(8)-Br(4)  | 179.9(9)   |
| Br(3)-C(7)-C(8)-Br(4) | -1.9(12)   |
| C(2)-N(1)-C(9)-C(8)   | 178.5(13)  |
| C(10)-N(1)-C(9)-C(8)  | 2(2)       |
| C(2)-N(1)-C(9)-C(4)   | -2.5(15)   |
| C(10)-N(1)-C(9)-C(4)  | -179.0(14) |
| C(7)-C(8)-C(9)-N(1)   | 179.6(11)  |
| Br(4)-C(8)-C(9)-N(1)  | -0.1(17)   |
| C(7)-C(8)-C(9)-C(4)   | 0.8(16)    |
| Br(4)-C(8)-C(9)-C(4)  | -178.9(9)  |
| C(5)-C(4)-C(9)-N(1)   | -178.9(12) |
| N(3)-C(4)-C(9)-N(1)   | 2.1(14)    |
| C(5)-C(4)-C(9)-C(8)   | 0.2(18)    |
| N(3)-C(4)-C(9)-C(8)   | -178.8(11) |
| C(2)-N(1)-C(10)-C(11) | -96.2(14)  |

|                         |            |
|-------------------------|------------|
| C(9)-N(1)-C(10)-C(11)   | 80.4(18)   |
| N(1)-C(10)-C(11)-C(12)  | -176.9(11) |
| C(10)-C(11)-C(12)-C(13) | 57.7(16)   |
| C(10)-C(11)-C(12)-C(18) | -180.0(12) |
| C(10)-C(11)-C(12)-C(17) | -63.3(15)  |
| C(18)-C(12)-C(13)-C(14) | 56.0(16)   |
| C(11)-C(12)-C(13)-C(14) | 179.6(13)  |
| C(17)-C(12)-C(13)-C(14) | -58.0(16)  |
| C(12)-C(13)-C(14)-C(20) | -59.5(19)  |
| C(12)-C(13)-C(14)-C(15) | 61.9(18)   |
| C(20)-C(14)-C(15)-C(16) | 57.6(19)   |
| C(13)-C(14)-C(15)-C(16) | -62.0(18)  |
| C(14)-C(15)-C(16)-C(21) | -57.6(17)  |
| C(14)-C(15)-C(16)-C(17) | 61.7(19)   |
| C(15)-C(16)-C(17)-C(12) | -60(2)     |
| C(21)-C(16)-C(17)-C(12) | 60.5(17)   |
| C(13)-C(12)-C(17)-C(16) | 57.3(16)   |
| C(18)-C(12)-C(17)-C(16) | -58.2(16)  |
| C(11)-C(12)-C(17)-C(16) | -177.6(13) |
| C(13)-C(12)-C(18)-C(19) | -60.0(16)  |
| C(11)-C(12)-C(18)-C(19) | 174.1(13)  |
| C(17)-C(12)-C(18)-C(19) | 55.0(16)   |
| C(12)-C(18)-C(19)-C(21) | -56.7(17)  |
| C(12)-C(18)-C(19)-C(20) | 62.1(18)   |
| C(13)-C(14)-C(20)-C(19) | 62.4(19)   |
| C(15)-C(14)-C(20)-C(19) | -57(2)     |
| C(18)-C(19)-C(20)-C(14) | -64.5(19)  |
| C(21)-C(19)-C(20)-C(14) | 56.6(19)   |
| C(15)-C(16)-C(21)-C(19) | 61.5(19)   |
| C(17)-C(16)-C(21)-C(19) | -58.9(19)  |
| C(18)-C(19)-C(21)-C(16) | 58.4(19)   |
| C(20)-C(19)-C(21)-C(16) | -59.0(19)  |

---

Table S16. Atomic coordinates ( $\times 10^4$ ) and equivalent isotropic displacement parameters ( $\text{\AA}^2 \times 10^3$ ) for tIAB.  $U(\text{eq})$  is defined as one third of the trace of the orthogonalized  $U^{ij}$  tensor.

|       | x         | y        | z        | U(eq) |
|-------|-----------|----------|----------|-------|
| I(1)  | 7007(1)   | 8686(1)  | 2478(1)  | 64(1) |
| I(2)  | 11006(2)  | 6595(1)  | 2813(1)  | 78(1) |
| I(3)  | 13477(1)  | 5515(1)  | 991(1)   | 72(1) |
| I(4)  | 12442(1)  | 6685(1)  | -1009(1) | 72(1) |
| N(1)  | 8557(13)  | 8728(8)  | -682(5)  | 48(2) |
| C(2)  | 7117(16)  | 9393(10) | -336(6)  | 53(2) |
| N(3)  | 6920(13)  | 9288(8)  | 470(5)   | 54(2) |
| C(4)  | 8326(14)  | 8445(8)  | 694(6)   | 45(2) |
| C(5)  | 8736(14)  | 8016(8)  | 1493(6)  | 43(2) |
| C(6)  | 10244(14) | 7207(8)  | 1582(6)  | 45(2) |
| C(7)  | 11309(15) | 6805(8)  | 868(6)   | 45(2) |
| C(8)  | 10863(14) | 7254(8)  | 54(6)    | 43(2) |
| C(9)  | 9379(13)  | 8080(8)  | -24(5)   | 41(2) |
| C(10) | 8891(16)  | 8703(9)  | -1627(6) | 49(2) |
| C(11) | 7385(14)  | 7731(8)  | -2264(6) | 45(2) |
| C(12) | 7523(12)  | 7699(7)  | -3248(5) | 35(2) |
| C(13) | 9612(13)  | 7300(8)  | -3482(6) | 41(2) |
| C(14) | 9674(13)  | 7213(8)  | -4472(6) | 42(2) |
| C(15) | 9371(14)  | 8511(9)  | -4740(6) | 46(2) |
| C(16) | 7282(14)  | 8911(8)  | -4526(6) | 45(2) |
| C(17) | 7221(14)  | 8977(7)  | -3524(6) | 41(2) |
| C(18) | 5770(13)  | 6756(8)  | -3808(6) | 41(2) |
| C(19) | 5824(14)  | 6694(8)  | -4810(6) | 45(2) |
| C(20) | 7899(15)  | 6298(8)  | -5017(6) | 50(2) |
| C(21) | 5546(15)  | 7965(9)  | -5061(6) | 49(2) |

Table S17. Bond lengths [Å] and angles [°] for tIAB.

|              |           |
|--------------|-----------|
| I(1)-C(5)    | 2.096(9)  |
| I(2)-C(6)    | 2.109(8)  |
| I(3)-C(7)    | 2.083(9)  |
| I(4)-C(8)    | 2.099(8)  |
| N(1)-C(2)    | 1.352(12) |
| N(1)-C(9)    | 1.391(11) |
| N(1)-C(10)   | 1.498(10) |
| C(2)-N(3)    | 1.286(13) |
| C(2)-H(2)    | 0.9300    |
| N(3)-C(4)    | 1.395(12) |
| C(4)-C(5)    | 1.380(12) |
| C(4)-C(9)    | 1.408(12) |
| C(5)-C(6)    | 1.379(13) |
| C(6)-C(7)    | 1.416(13) |
| C(7)-C(8)    | 1.414(12) |
| C(8)-C(9)    | 1.379(12) |
| C(10)-C(11)  | 1.518(12) |
| C(10)-H(10A) | 0.9700    |
| C(10)-H(10B) | 0.9700    |
| C(11)-C(12)  | 1.525(11) |
| C(11)-H(11A) | 0.9700    |
| C(11)-H(11B) | 0.9700    |
| C(12)-C(13)  | 1.539(11) |
| C(12)-C(17)  | 1.544(10) |
| C(12)-C(18)  | 1.545(11) |
| C(13)-C(14)  | 1.518(12) |
| C(13)-H(13A) | 0.9700    |
| C(13)-H(13B) | 0.9700    |
| C(14)-C(20)  | 1.529(12) |
| C(14)-C(15)  | 1.561(12) |
| C(14)-H(14)  | 0.9800    |
| C(15)-C(16)  | 1.529(13) |
| C(15)-H(15A) | 0.9700    |
| C(15)-H(15B) | 0.9700    |



|                 |           |
|-----------------|-----------|
| C(16)-C(21)     | 1.526(13) |
| C(16)-C(17)     | 1.538(12) |
| C(16)-H(16)     | 0.9800    |
| C(17)-H(17A)    | 0.9700    |
| C(17)-H(17B)    | 0.9700    |
| C(18)-C(19)     | 1.538(12) |
| C(18)-H(18A)    | 0.9700    |
| C(18)-H(18B)    | 0.9700    |
| C(19)-C(20)     | 1.516(13) |
| C(19)-C(21)     | 1.519(13) |
| C(19)-H(19)     | 0.9800    |
| C(20)-H(20A)    | 0.9700    |
| C(20)-H(20B)    | 0.9700    |
| C(21)-H(21A)    | 0.9700    |
| C(21)-H(21B)    | 0.9700    |
| C(2)-N(1)-C(9)  | 106.0(7)  |
| C(2)-N(1)-C(10) | 121.7(8)  |
| C(9)-N(1)-C(10) | 132.0(8)  |
| N(3)-C(2)-N(1)  | 115.5(8)  |
| N(3)-C(2)-H(2)  | 122.3     |
| N(1)-C(2)-H(2)  | 122.3     |
| C(2)-N(3)-C(4)  | 104.0(8)  |
| C(5)-C(4)-N(3)  | 127.6(8)  |
| C(5)-C(4)-C(9)  | 122.3(9)  |
| N(3)-C(4)-C(9)  | 110.1(8)  |
| C(6)-C(5)-C(4)  | 118.1(8)  |
| C(6)-C(5)-I(1)  | 125.8(6)  |
| C(4)-C(5)-I(1)  | 116.2(7)  |
| C(5)-C(6)-C(7)  | 121.1(8)  |
| C(5)-C(6)-I(2)  | 119.1(6)  |
| C(7)-C(6)-I(2)  | 119.8(7)  |
| C(8)-C(7)-C(6)  | 120.0(8)  |
| C(8)-C(7)-I(3)  | 119.4(7)  |
| C(6)-C(7)-I(3)  | 120.6(6)  |
| C(9)-C(8)-C(7)  | 118.6(8)  |
| C(9)-C(8)-I(4)  | 120.8(6)  |

|                     |          |
|---------------------|----------|
| C(7)-C(8)-I(4)      | 120.7(7) |
| C(8)-C(9)-N(1)      | 135.7(8) |
| C(8)-C(9)-C(4)      | 120.0(8) |
| N(1)-C(9)-C(4)      | 104.3(7) |
| N(1)-C(10)-C(11)    | 111.4(7) |
| N(1)-C(10)-H(10A)   | 109.3    |
| C(11)-C(10)-H(10A)  | 109.3    |
| N(1)-C(10)-H(10B)   | 109.3    |
| C(11)-C(10)-H(10B)  | 109.3    |
| H(10A)-C(10)-H(10B) | 108.0    |
| C(10)-C(11)-C(12)   | 114.9(7) |
| C(10)-C(11)-H(11A)  | 108.5    |
| C(12)-C(11)-H(11A)  | 108.5    |
| C(10)-C(11)-H(11B)  | 108.5    |
| C(12)-C(11)-H(11B)  | 108.5    |
| H(11A)-C(11)-H(11B) | 107.5    |
| C(11)-C(12)-C(13)   | 112.5(7) |
| C(11)-C(12)-C(17)   | 111.3(7) |
| C(13)-C(12)-C(17)   | 108.4(6) |
| C(11)-C(12)-C(18)   | 108.6(6) |
| C(13)-C(12)-C(18)   | 108.0(7) |
| C(17)-C(12)-C(18)   | 107.9(6) |
| C(14)-C(13)-C(12)   | 111.6(7) |
| C(14)-C(13)-H(13A)  | 109.3    |
| C(12)-C(13)-H(13A)  | 109.3    |
| C(14)-C(13)-H(13B)  | 109.3    |
| C(12)-C(13)-H(13B)  | 109.3    |
| H(13A)-C(13)-H(13B) | 108.0    |
| C(13)-C(14)-C(20)   | 110.6(7) |
| C(13)-C(14)-C(15)   | 108.8(7) |
| C(20)-C(14)-C(15)   | 107.6(7) |
| C(13)-C(14)-H(14)   | 109.9    |
| C(20)-C(14)-H(14)   | 109.9    |
| C(15)-C(14)-H(14)   | 109.9    |
| C(16)-C(15)-C(14)   | 109.3(6) |
| C(16)-C(15)-H(15A)  | 109.8    |

|                     |          |
|---------------------|----------|
| C(14)-C(15)-H(15A)  | 109.8    |
| C(16)-C(15)-H(15B)  | 109.8    |
| C(14)-C(15)-H(15B)  | 109.8    |
| H(15A)-C(15)-H(15B) | 108.3    |
| C(21)-C(16)-C(15)   | 108.8(8) |
| C(21)-C(16)-C(17)   | 109.6(7) |
| C(15)-C(16)-C(17)   | 110.1(7) |
| C(21)-C(16)-H(16)   | 109.4    |
| C(15)-C(16)-H(16)   | 109.4    |
| C(17)-C(16)-H(16)   | 109.4    |
| C(16)-C(17)-C(12)   | 110.4(7) |
| C(16)-C(17)-H(17A)  | 109.6    |
| C(12)-C(17)-H(17A)  | 109.6    |
| C(16)-C(17)-H(17B)  | 109.6    |
| C(12)-C(17)-H(17B)  | 109.6    |
| H(17A)-C(17)-H(17B) | 108.1    |
| C(19)-C(18)-C(12)   | 110.8(6) |
| C(19)-C(18)-H(18A)  | 109.5    |
| C(12)-C(18)-H(18A)  | 109.5    |
| C(19)-C(18)-H(18B)  | 109.5    |
| C(12)-C(18)-H(18B)  | 109.5    |
| H(18A)-C(18)-H(18B) | 108.1    |
| C(20)-C(19)-C(21)   | 109.3(7) |
| C(20)-C(19)-C(18)   | 109.6(7) |
| C(21)-C(19)-C(18)   | 109.5(7) |
| C(20)-C(19)-H(19)   | 109.5    |
| C(21)-C(19)-H(19)   | 109.5    |
| C(18)-C(19)-H(19)   | 109.5    |
| C(19)-C(20)-C(14)   | 110.1(7) |
| C(19)-C(20)-H(20A)  | 109.6    |
| C(14)-C(20)-H(20A)  | 109.6    |
| C(19)-C(20)-H(20B)  | 109.6    |
| C(14)-C(20)-H(20B)  | 109.6    |
| H(20A)-C(20)-H(20B) | 108.1    |
| C(19)-C(21)-C(16)   | 109.9(7) |
| C(19)-C(21)-H(21A)  | 109.7    |

|                     |       |
|---------------------|-------|
| C(16)-C(21)-H(21A)  | 109.7 |
| C(19)-C(21)-H(21B)  | 109.7 |
| C(16)-C(21)-H(21B)  | 109.7 |
| H(21A)-C(21)-H(21B) | 108.2 |

---

Table S18. Anisotropic displacement parameters ( $\text{\AA}^2 \times 10^3$ ) for tIAB. The anisotropic displacement factor exponent takes the form:  $-2\pi^2 [h^2 a^{*2} U^{11} + \dots + 2 h k a^* b^* U^{12}]$

|       | $U^{11}$ | $U^{22}$ | $U^{33}$ | $U^{23}$ | $U^{13}$ | $U^{12}$ |
|-------|----------|----------|----------|----------|----------|----------|
| I(1)  | 65(1)    | 89(1)    | 41(1)    | 2(1)     | 24(1)    | 8(1)     |
| I(2)  | 103(1)   | 96(1)    | 44(1)    | 29(1)    | 14(1)    | 26(1)    |
| I(3)  | 80(1)    | 76(1)    | 68(1)    | 22(1)    | 16(1)    | 32(1)    |
| I(4)  | 78(1)    | 102(1)   | 49(1)    | 19(1)    | 28(1)    | 45(1)    |
| N(1)  | 56(5)    | 62(4)    | 28(3)    | 11(3)    | 10(3)    | 12(3)    |
| C(2)  | 54(6)    | 64(5)    | 44(5)    | 9(4)     | 5(4)     | 25(4)    |
| N(3)  | 51(5)    | 72(5)    | 42(4)    | 8(4)     | 12(3)    | 24(4)    |
| C(4)  | 46(5)    | 53(5)    | 33(4)    | 4(3)     | 6(3)     | 5(4)     |
| C(5)  | 43(5)    | 52(4)    | 34(4)    | 5(3)     | 10(3)    | 3(3)     |
| C(6)  | 49(5)    | 55(5)    | 29(4)    | 11(3)    | 3(3)     | -2(4)    |
| C(7)  | 47(5)    | 48(4)    | 42(5)    | 10(3)    | 5(4)     | 11(4)    |
| C(8)  | 44(5)    | 55(5)    | 31(4)    | 6(3)     | 11(3)    | 9(4)     |
| C(9)  | 41(4)    | 48(4)    | 33(4)    | 6(3)     | 8(3)     | 8(3)     |
| C(10) | 57(5)    | 64(5)    | 28(4)    | 13(4)    | 11(4)    | 1(4)     |
| C(11) | 44(5)    | 56(5)    | 34(4)    | 13(3)    | 5(3)     | -2(4)    |
| C(12) | 37(4)    | 38(4)    | 32(4)    | 12(3)    | 8(3)     | 4(3)     |
| C(13) | 37(4)    | 42(4)    | 45(5)    | 14(3)    | 6(3)     | 4(3)     |
| C(14) | 36(4)    | 46(4)    | 45(5)    | 5(3)     | 15(3)    | 4(3)     |
| C(15) | 46(5)    | 58(5)    | 38(4)    | 18(4)    | 11(4)    | -7(4)    |
| C(16) | 52(5)    | 47(4)    | 40(4)    | 22(3)    | 7(4)     | 7(4)     |
| C(17) | 48(5)    | 37(4)    | 39(4)    | 10(3)    | 10(3)    | 4(3)     |
| C(18) | 34(4)    | 50(4)    | 40(4)    | 14(3)    | 8(3)     | -2(3)    |
| C(19) | 42(5)    | 53(5)    | 37(4)    | 3(3)     | 5(3)     | -9(4)    |
| C(20) | 55(6)    | 49(4)    | 44(5)    | -1(4)    | 14(4)    | 1(4)     |
| C(21) | 42(5)    | 70(6)    | 39(4)    | 19(4)    | 4(4)     | 9(4)     |

Table S19. Hydrogen coordinates ( $\times 10^4$ ) and isotropic displacement parameters ( $\text{\AA}^2 \times 10^3$ ) for tIAB.

|        | x     | y    | z     | U(eq) |
|--------|-------|------|-------|-------|
| H(2)   | 6323  | 9892 | -659  | 64    |
| H(10A) | 10306 | 8526 | -1677 | 59    |
| H(10B) | 8705  | 9512 | -1790 | 59    |
| H(11A) | 5980  | 7879 | -2173 | 53    |
| H(11B) | 7637  | 6922 | -2113 | 53    |
| H(13A) | 10732 | 7895 | -3149 | 49    |
| H(13B) | 9827  | 6500 | -3308 | 49    |
| H(14)  | 11012 | 6950 | -4604 | 50    |
| H(15A) | 10490 | 9113 | -4414 | 56    |
| H(15B) | 9403  | 8470 | -5372 | 56    |
| H(16)  | 7090  | 9727 | -4691 | 54    |
| H(17A) | 5895  | 9236 | -3393 | 49    |
| H(17B) | 8311  | 9586 | -3184 | 49    |
| H(18A) | 5932  | 5942 | -3649 | 49    |
| H(18B) | 4434  | 6996 | -3678 | 49    |
| H(19)  | 4700  | 6094 | -5154 | 54    |
| H(20A) | 7940  | 6267 | -5648 | 60    |
| H(20B) | 8064  | 5475 | -4877 | 60    |
| H(21A) | 4208  | 8217 | -4941 | 59    |
| H(21B) | 5573  | 7929 | -5694 | 59    |

Table S20. Torsion angles [°] for tIAB.

---

|                       |           |
|-----------------------|-----------|
| C(9)-N(1)-C(2)-N(3)   | 1.5(12)   |
| C(10)-N(1)-C(2)-N(3)  | 176.8(9)  |
| N(1)-C(2)-N(3)-C(4)   | -1.5(12)  |
| C(2)-N(3)-C(4)-C(5)   | 179.5(10) |
| C(2)-N(3)-C(4)-C(9)   | 0.9(11)   |
| N(3)-C(4)-C(5)-C(6)   | -178.0(9) |
| C(9)-C(4)-C(5)-C(6)   | 0.4(13)   |
| N(3)-C(4)-C(5)-I(1)   | 1.2(13)   |
| C(9)-C(4)-C(5)-I(1)   | 179.6(7)  |
| C(4)-C(5)-C(6)-C(7)   | -1.4(13)  |
| I(1)-C(5)-C(6)-C(7)   | 179.5(7)  |
| C(4)-C(5)-C(6)-I(2)   | 177.3(6)  |
| I(1)-C(5)-C(6)-I(2)   | -1.8(10)  |
| C(5)-C(6)-C(7)-C(8)   | 1.3(13)   |
| I(2)-C(6)-C(7)-C(8)   | -177.3(7) |
| C(5)-C(6)-C(7)-I(3)   | -176.9(7) |
| I(2)-C(6)-C(7)-I(3)   | 4.4(10)   |
| C(6)-C(7)-C(8)-C(9)   | -0.2(13)  |
| I(3)-C(7)-C(8)-C(9)   | 178.1(6)  |
| C(6)-C(7)-C(8)-I(4)   | 179.4(6)  |
| I(3)-C(7)-C(8)-I(4)   | -2.3(10)  |
| C(7)-C(8)-C(9)-N(1)   | 178.5(10) |
| I(4)-C(8)-C(9)-N(1)   | -1.2(15)  |
| C(7)-C(8)-C(9)-C(4)   | -0.8(13)  |
| I(4)-C(8)-C(9)-C(4)   | 179.6(6)  |
| C(2)-N(1)-C(9)-C(8)   | 179.9(11) |
| C(10)-N(1)-C(9)-C(8)  | 5.3(18)   |
| C(2)-N(1)-C(9)-C(4)   | -0.8(10)  |
| C(10)-N(1)-C(9)-C(4)  | -175.4(9) |
| C(5)-C(4)-C(9)-C(8)   | 0.7(14)   |
| N(3)-C(4)-C(9)-C(8)   | 179.4(8)  |
| C(5)-C(4)-C(9)-N(1)   | -178.7(8) |
| N(3)-C(4)-C(9)-N(1)   | -0.1(10)  |
| C(2)-N(1)-C(10)-C(11) | -85.1(11) |

|                         |           |
|-------------------------|-----------|
| C(9)-N(1)-C(10)-C(11)   | 88.8(12)  |
| N(1)-C(10)-C(11)-C(12)  | 176.2(8)  |
| C(10)-C(11)-C(12)-C(13) | 65.8(10)  |
| C(10)-C(11)-C(12)-C(17) | -56.1(10) |
| C(10)-C(11)-C(12)-C(18) | -174.7(8) |
| C(11)-C(12)-C(13)-C(14) | 177.2(7)  |
| C(17)-C(12)-C(13)-C(14) | -59.4(8)  |
| C(18)-C(12)-C(13)-C(14) | 57.4(8)   |
| C(12)-C(13)-C(14)-C(20) | -57.9(9)  |
| C(12)-C(13)-C(14)-C(15) | 60.1(8)   |
| C(13)-C(14)-C(15)-C(16) | -59.3(9)  |
| C(20)-C(14)-C(15)-C(16) | 60.6(9)   |
| C(14)-C(15)-C(16)-C(21) | -60.7(9)  |
| C(14)-C(15)-C(16)-C(17) | 59.4(9)   |
| C(21)-C(16)-C(17)-C(12) | 60.1(9)   |
| C(15)-C(16)-C(17)-C(12) | -59.6(9)  |
| C(11)-C(12)-C(17)-C(16) | -177.8(7) |
| C(13)-C(12)-C(17)-C(16) | 58.0(9)   |
| C(18)-C(12)-C(17)-C(16) | -58.8(9)  |
| C(11)-C(12)-C(18)-C(19) | 179.5(7)  |
| C(13)-C(12)-C(18)-C(19) | -58.3(9)  |
| C(17)-C(12)-C(18)-C(19) | 58.8(9)   |
| C(12)-C(18)-C(19)-C(20) | 60.1(9)   |
| C(12)-C(18)-C(19)-C(21) | -59.8(9)  |
| C(21)-C(19)-C(20)-C(14) | 61.2(10)  |
| C(18)-C(19)-C(20)-C(14) | -58.7(9)  |
| C(13)-C(14)-C(20)-C(19) | 58.0(10)  |
| C(15)-C(14)-C(20)-C(19) | -60.8(9)  |
| C(20)-C(19)-C(21)-C(16) | -60.4(10) |
| C(18)-C(19)-C(21)-C(16) | 59.6(10)  |
| C(15)-C(16)-C(21)-C(19) | 60.5(9)   |
| C(17)-C(16)-C(21)-C(19) | -59.9(10) |

---
